# Supplementary material for: Investigating the Effects of Donors and Alkyne Spacer on the Properties of Donor-Acceptor-Donor Xanthene-Based Dyes
Source: MDPI journal article supplement (doi:10.3390/molecules28134929), 2023-06-22

# Investigation of donors and alkyne spacer on the properties of donor-acceptor-donor xanthene-based dyes

Ishanka N. Rajapaksha<sup>1</sup>, Jing Wang,<sup>2</sup> Jerzy Leszczynski,<sup>2</sup> and Colleen N. Scott<sup>1\*</sup>

Supporting information

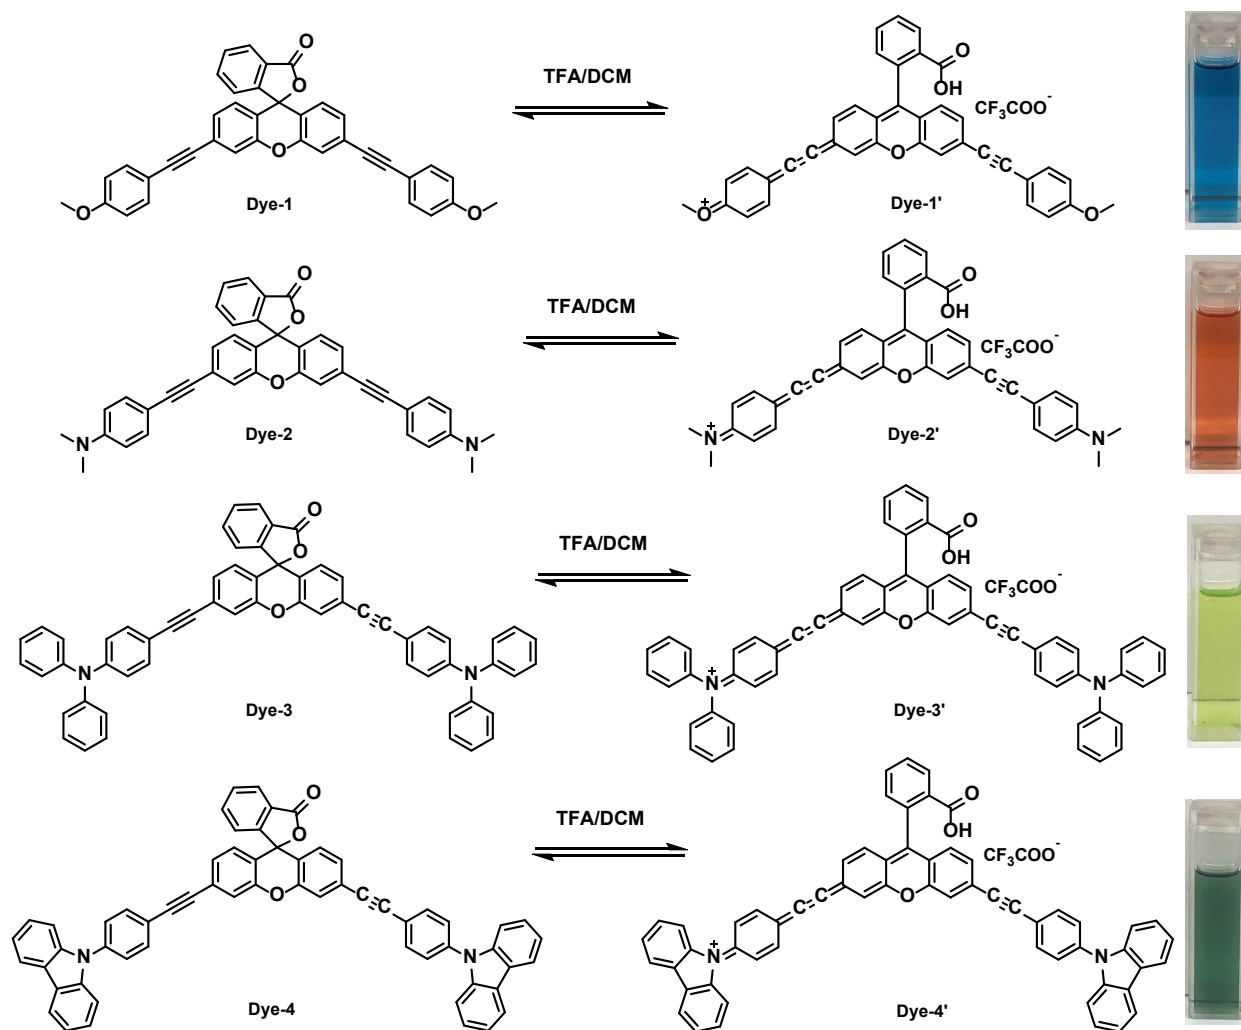

**Figure S1** Structures and colors of **Dyes 1-4** after opening with TFA.

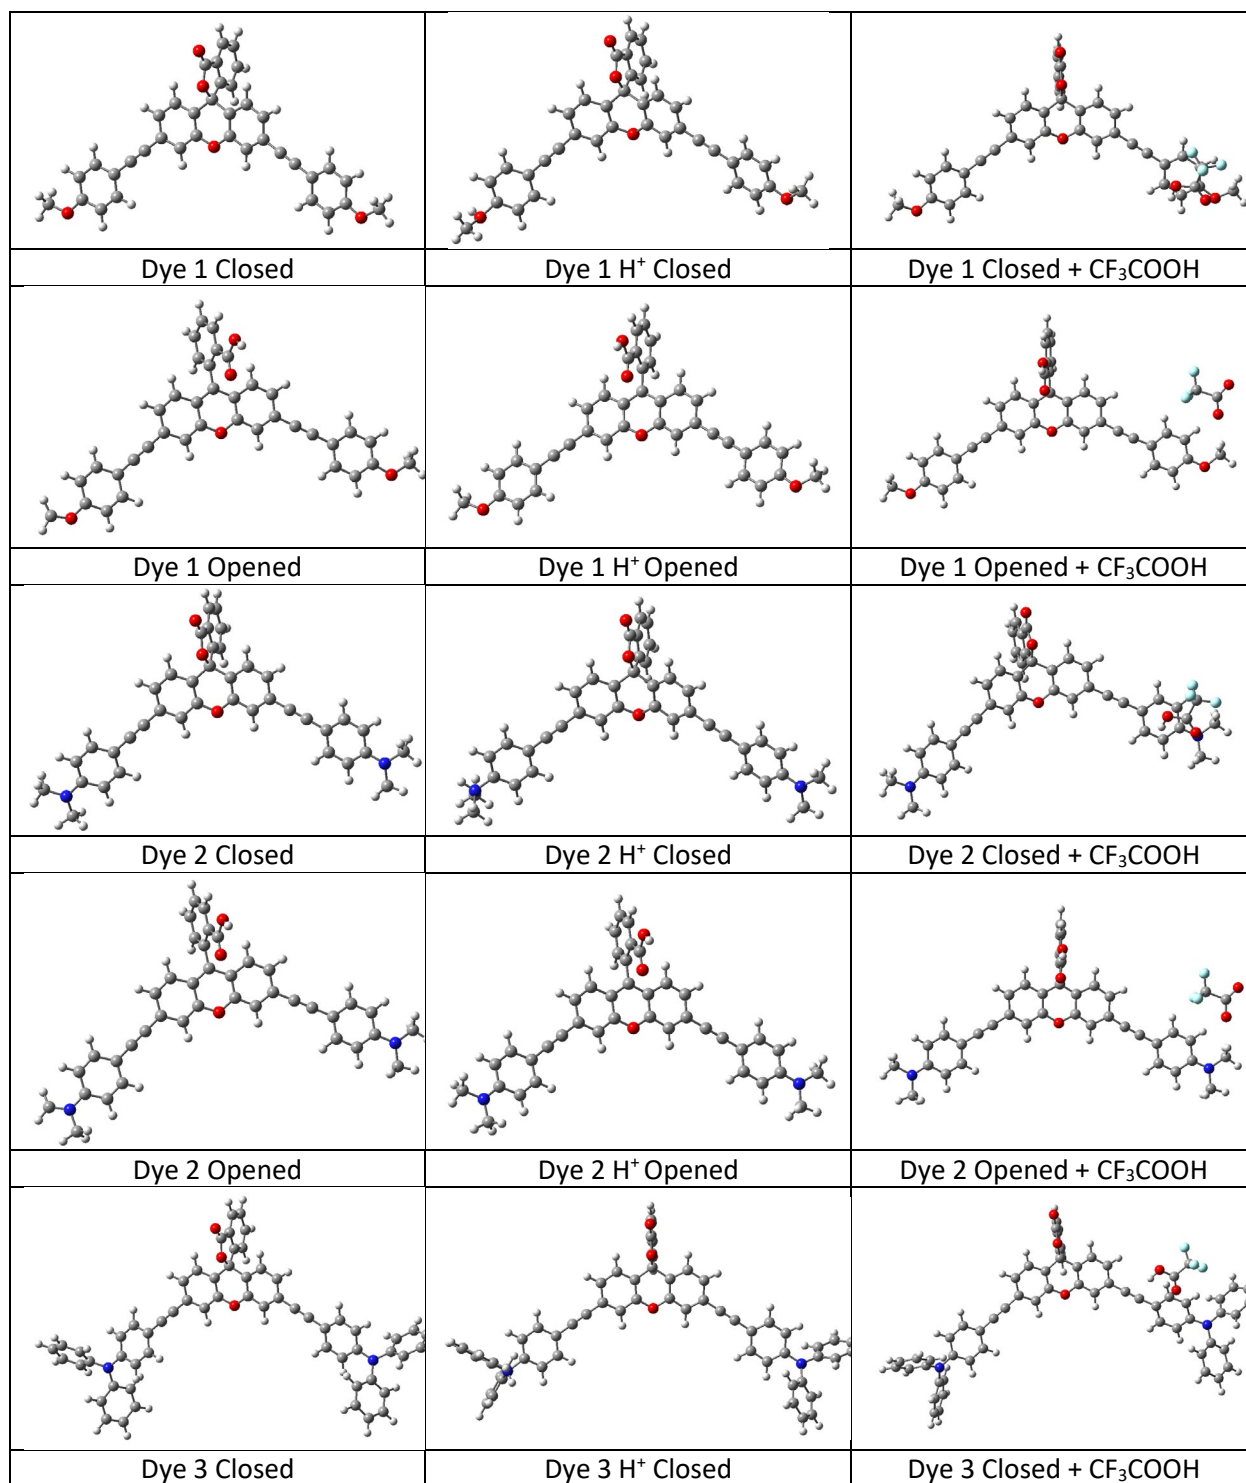

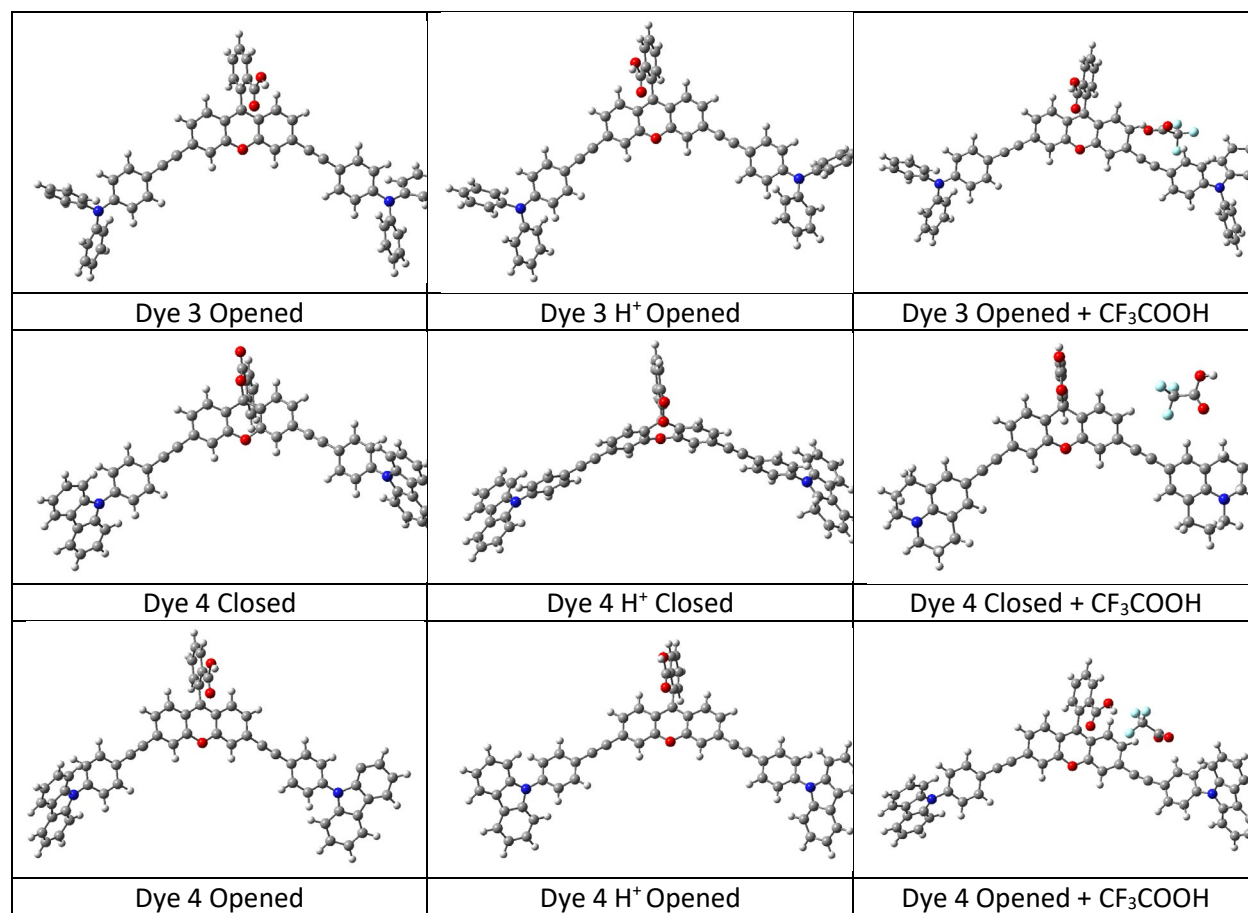

**Figure S2.** Optimized structures in gas phase with neutral form, positive charged form, and CF<sub>3</sub>COOH combined complex (M06-2X/6-311G(d,p) level)

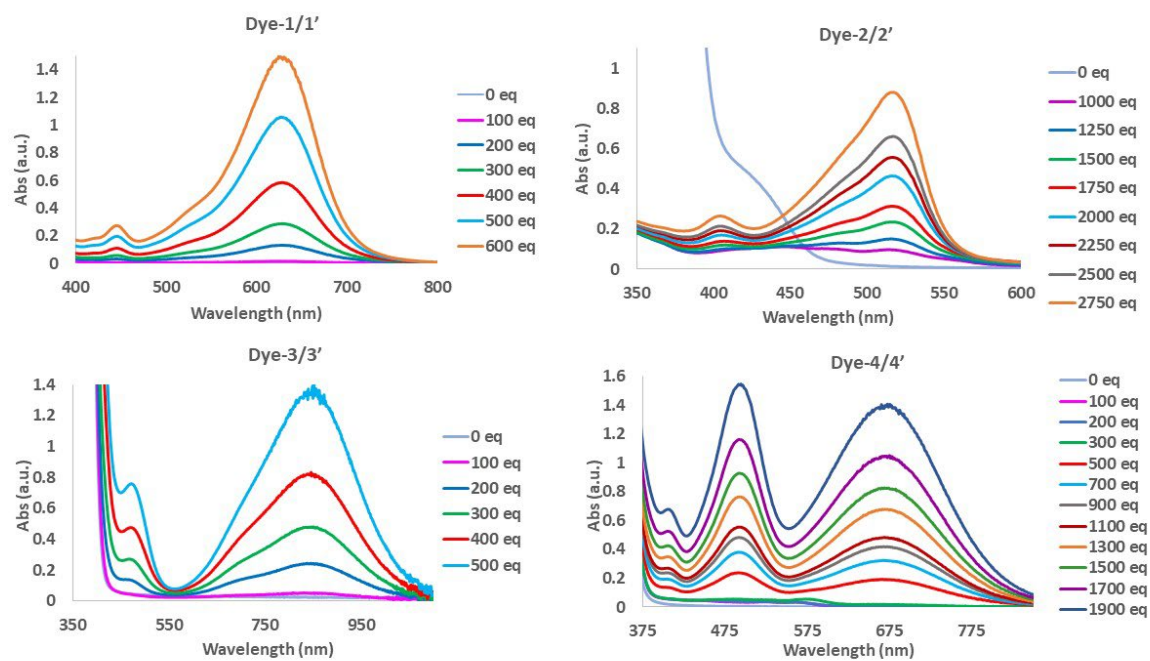

**Figure S3.** Opening of **Dyes 1-4** with different equivalents of TFA

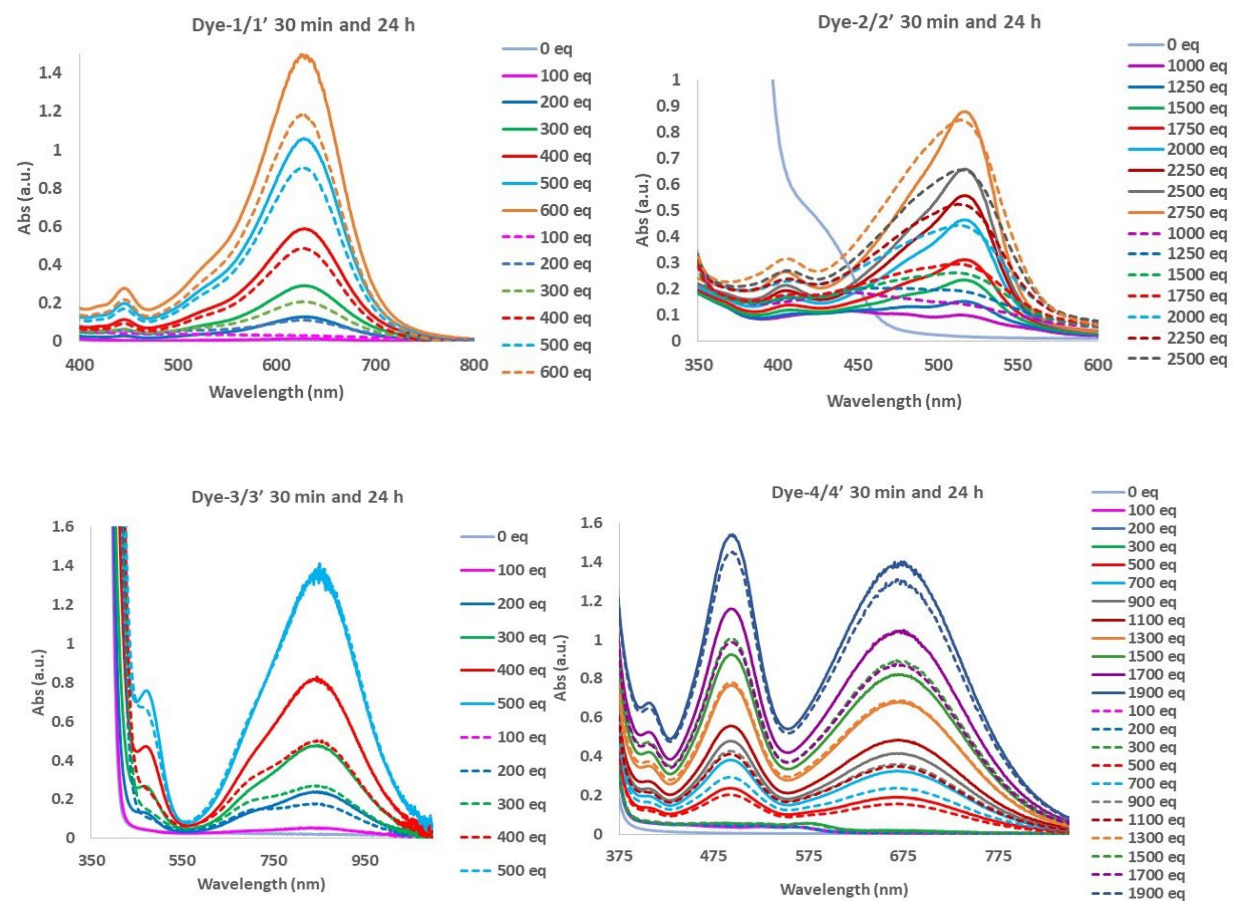

**Figure S4.** Equilibration of the dyes for 24 h with different equivalents of TFA. 30 mins (solid lines); 24 h (dashed lines).

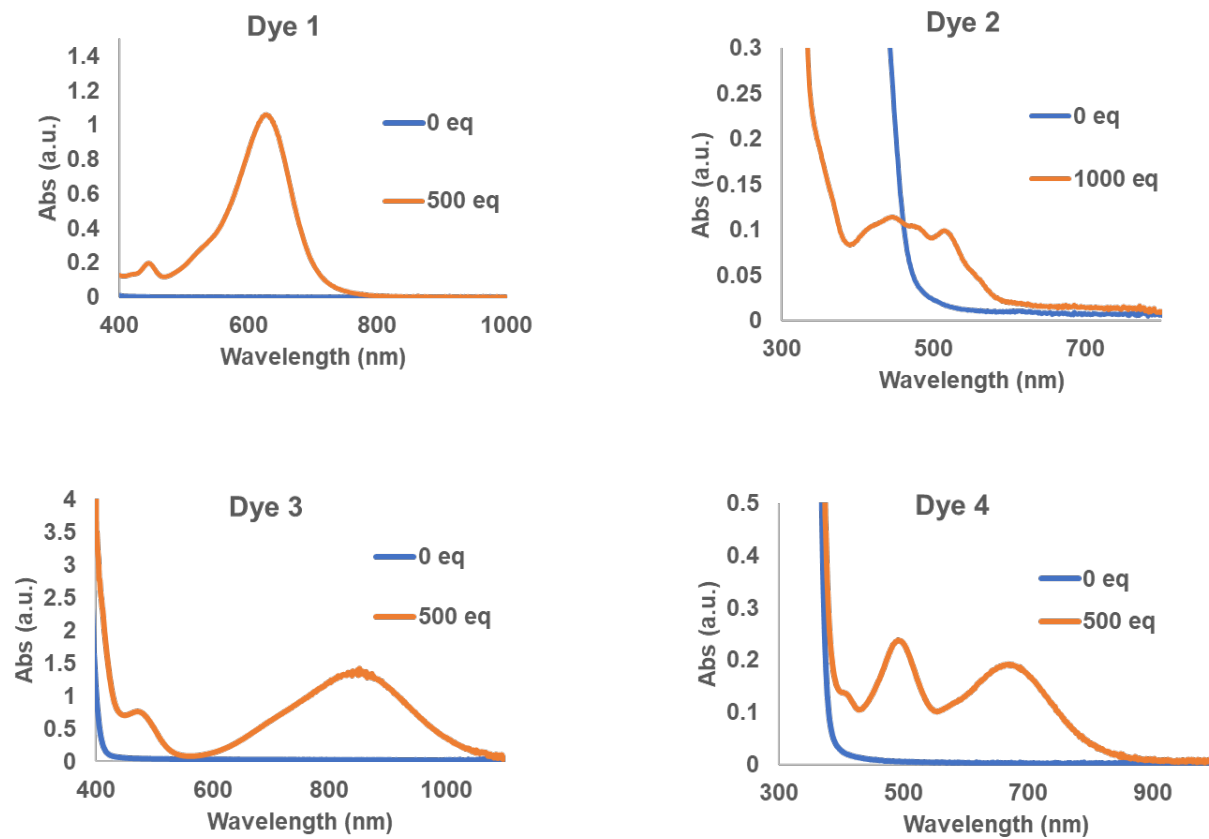

**Figure S5.** Absorption spectra of **Dyes 1-4** in closed (0 eq TFA) and opened (500 or 1000 eq TFA) that was used to calculate the difference on the absorbance intensity between the closed and opened forms.

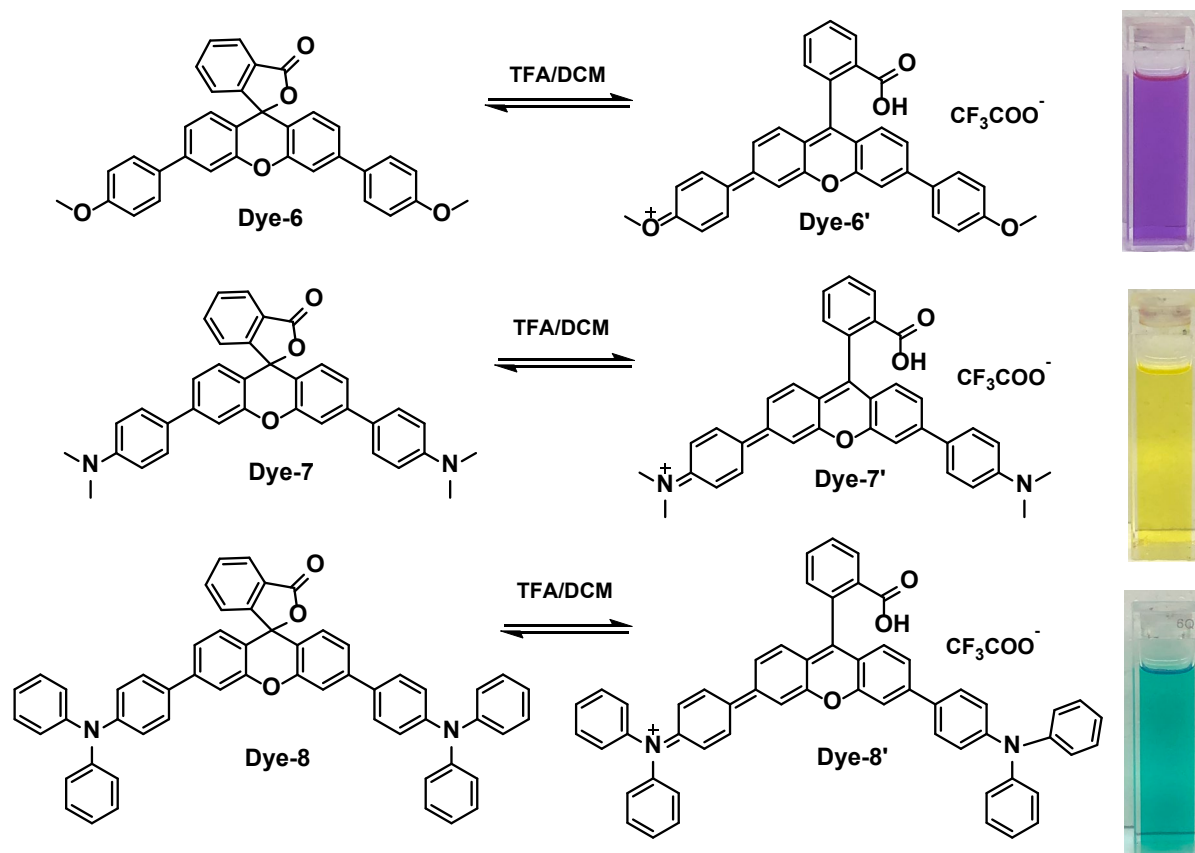

**Figure S6.** Structures and colors of **Dyes 6-8** after opening with TFA.

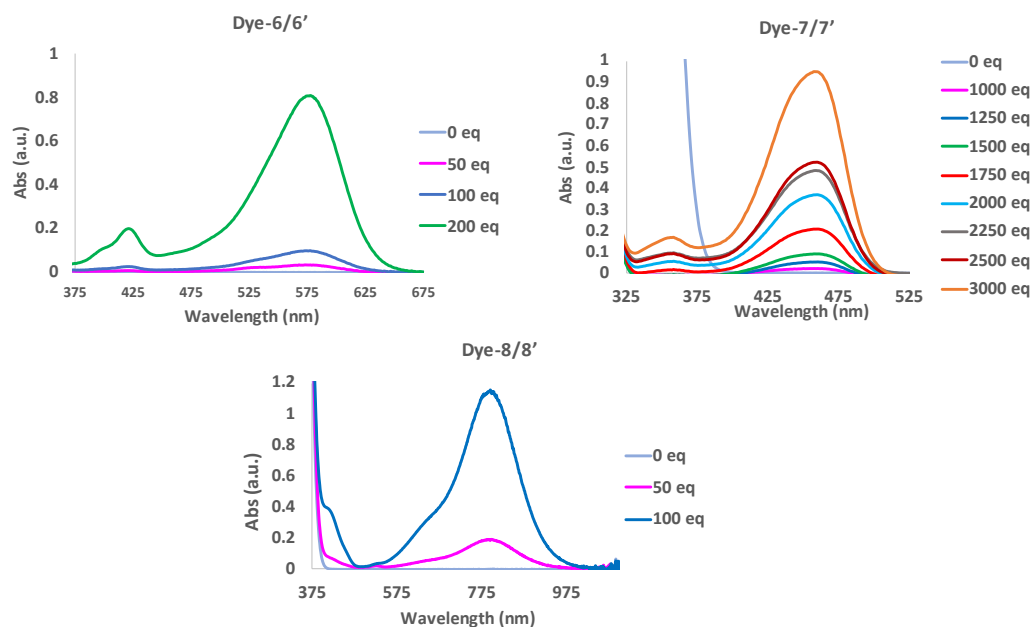

**Figure S7.** Opening of **Dyes 6-8** with different equivalents of TFA.

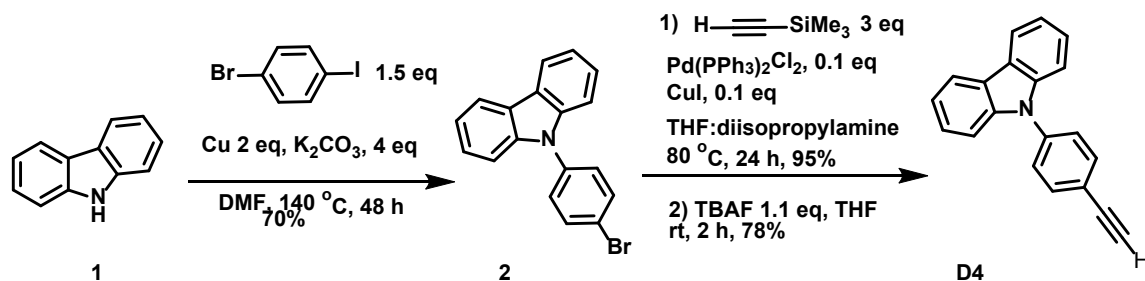

**Scheme S1** Synthesis of **D-4** compound

#### Synthesis of 9-(4-ethynylphenyl)-9H-carbazole (**D4**)

9-(4-bromophenyl)-9H-carbazole[51] (Compound 2) (0.3104 mmol, 100 mg), PdCl<sub>2</sub>(PPh<sub>3</sub>)<sub>2</sub> (0.0310 mmol, 21.8 mg), and CuI (0.0310 mmol, 5.90 mg) were added into a dried microwave vial in the glovebox. THF (0.5 mL), diisopropylamine (1.5 mL), and TMS-acetylene (1.552 mmol, 0.23 mL) were added to the vial under nitrogen atmosphere and the reaction mixture was stirred at 80 °C for 24 h. The reaction mixture was allowed to come to room temperature and diluted with DI water (30 mL) and DCM (20 mL). The layers were separated, and the aqueous phase was extracted with DCM (3 x 20 mL). The combined organic layer was washed with 0.1 M HCl, saturated sodium bicarbonate solution, dried over anhydrous sodium sulfate, filtered, and concentrated under reduced vacuum. The crude was purified by flash column chromatography using hexanes as the eluent to give 9-(4-((trimethylsilyl)ethynyl)phenyl)-9H-carbazole product as a white solid in 95 % yield. <sup>1</sup>H NMR (500 MHz, CDCl<sub>3</sub>) δ 8.17 (d, *J* = 5.6 Hz, 2H), 7.73 (d, *J* = 8.5 Hz, 2H), 7.55 (d, *J* = 8.4 Hz, 2H), 7.47 – 7.41 (m, 4H), 7.33 (m, *J* = 5.2, 2.5 Hz, 2H), 0.34 (s, 9H).

9-(4-((trimethylsilyl)ethynyl)phenyl)-9H-carbazole (0.2945 mmol, 100 mg) and THF (2 mL) were added into a dried round bottom flask. To the reaction mixture was added tetra-*n*-butylammonium fluoride (TBAF) (1M in THF, 0.3534 mmol) under nitrogen atmosphere for 2 h. The reaction mixture was diluted with DI water 30 mL and DCM 20 mL. The layers were separated, and the aqueous phase was extracted with DCM (3 x 20 mL). The combined organic layer was washed with 0.1 M HCl and saturated sodium bicarbonate solution, dried over anhydrous sodium sulfate, filtered, and concentrated under reduced pressure. The crude was purified by flash column chromatography using hexanes as the eluent **D4** as a white solid in 78 % yield. <sup>1</sup>H NMR (500 MHz, CDCl<sub>3</sub>) δ 8.14 (d, *J* = 7.8 Hz, 2H), 7.73 (d, *J* = 8.5 Hz, 2H), 7.56 (d, *J* = 8.5 Hz, 2H), 7.42 (d, *J* = 2.4 Hz, 4H), 7.34 – 7.29 (m, 2H), 3.18 (s, 1H).

**<sup>1</sup>H NMR of compound Dye-1 (500 MHz)**

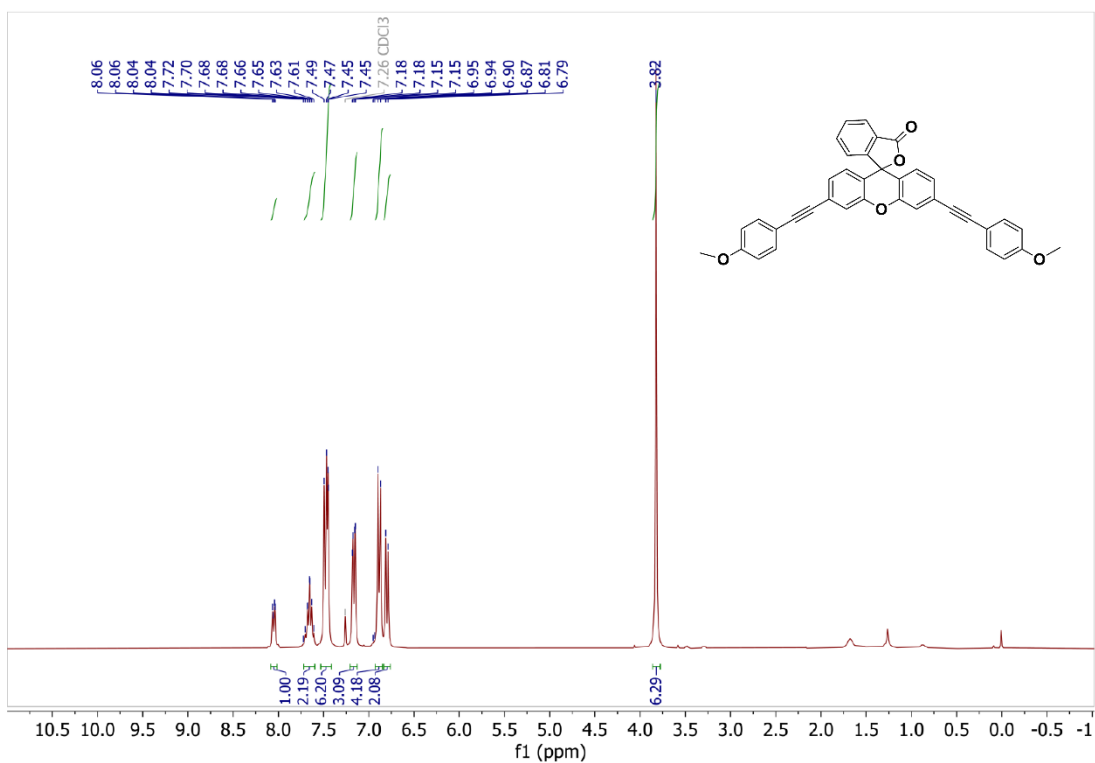



**<sup>13</sup>C NMR of compound Dye-1 (125 MHz)**

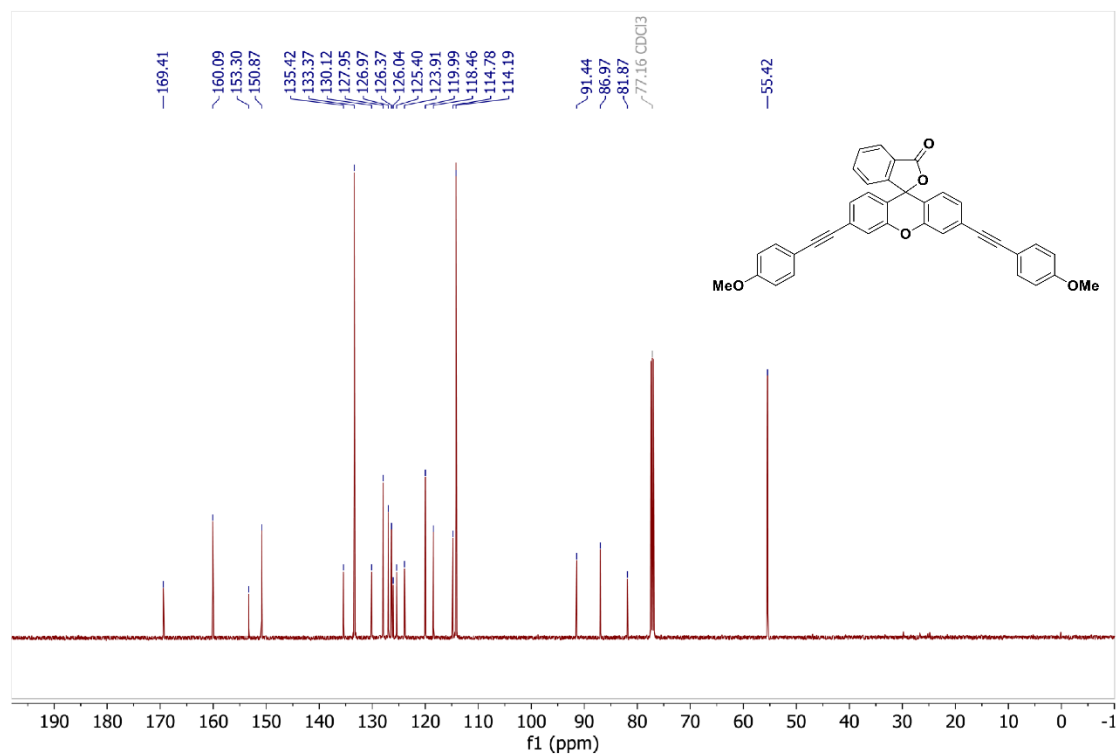

**<sup>1</sup>H NMR of compound Dye-2 (500 MHz)**

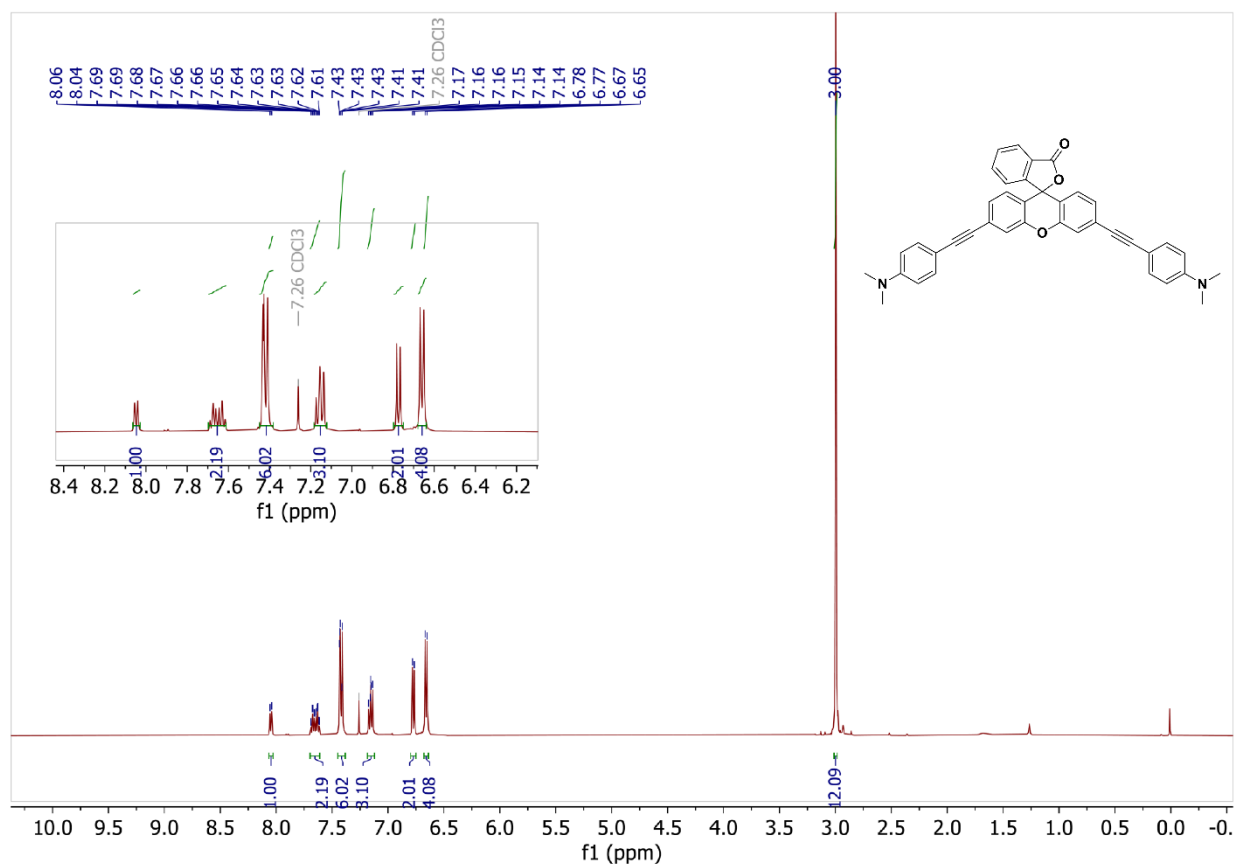

**$^{13}\text{C}$  NMR of compound Dye-2 (125 MHz)**

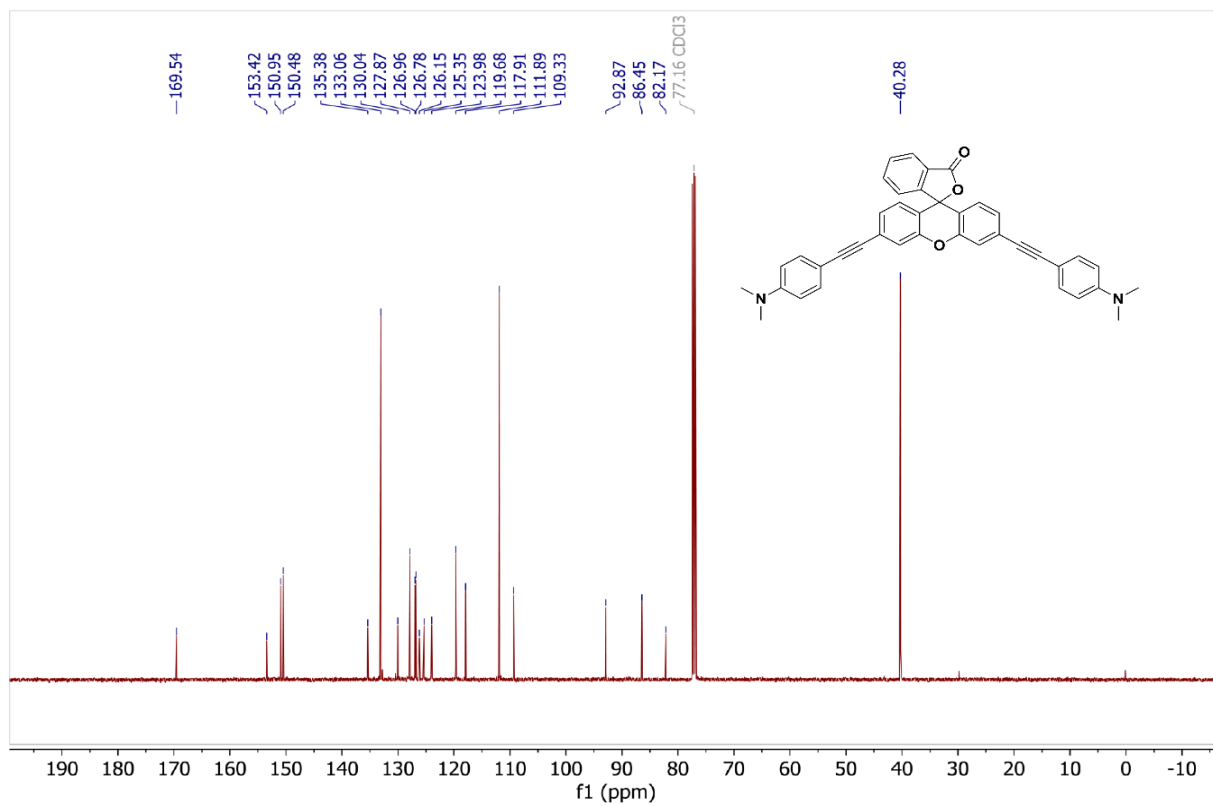

<sup>1</sup>H NMR of compound Dye-3 (500 MHz)

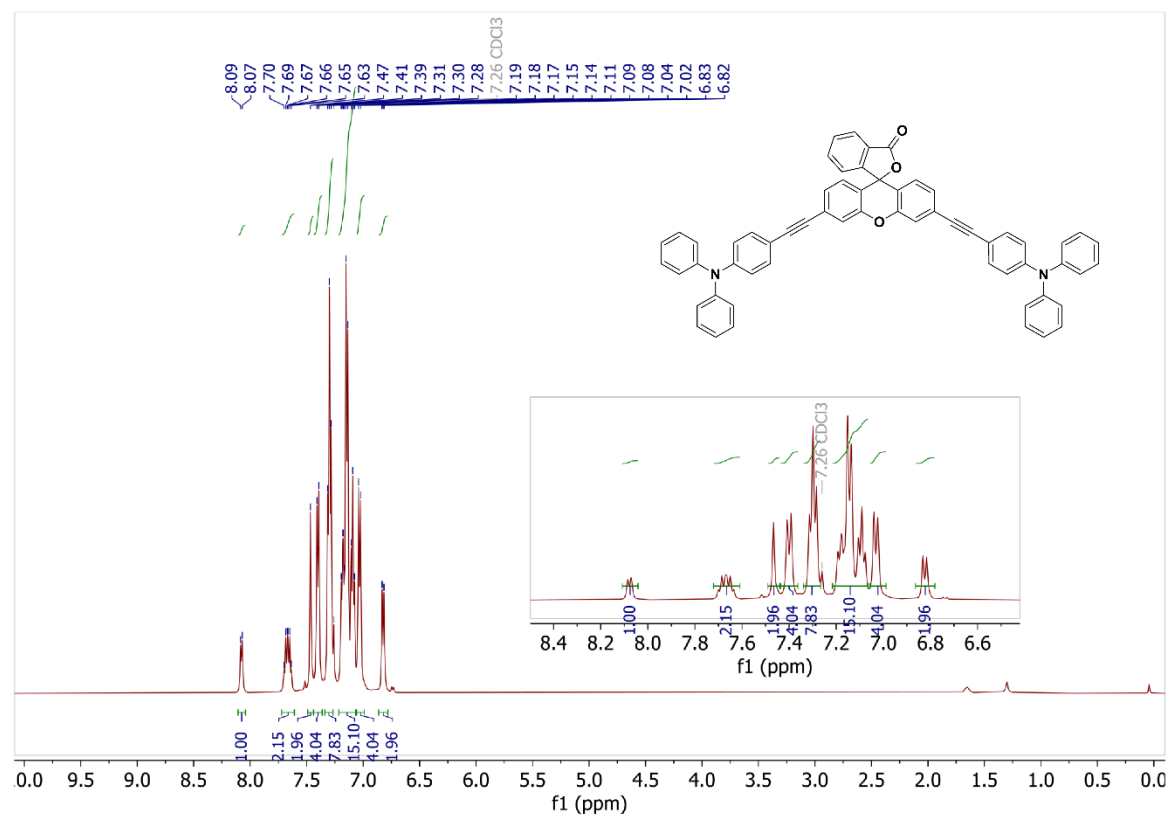

**$^{13}\text{C}$  NMR of compound Dye-3 (125 MHz)**

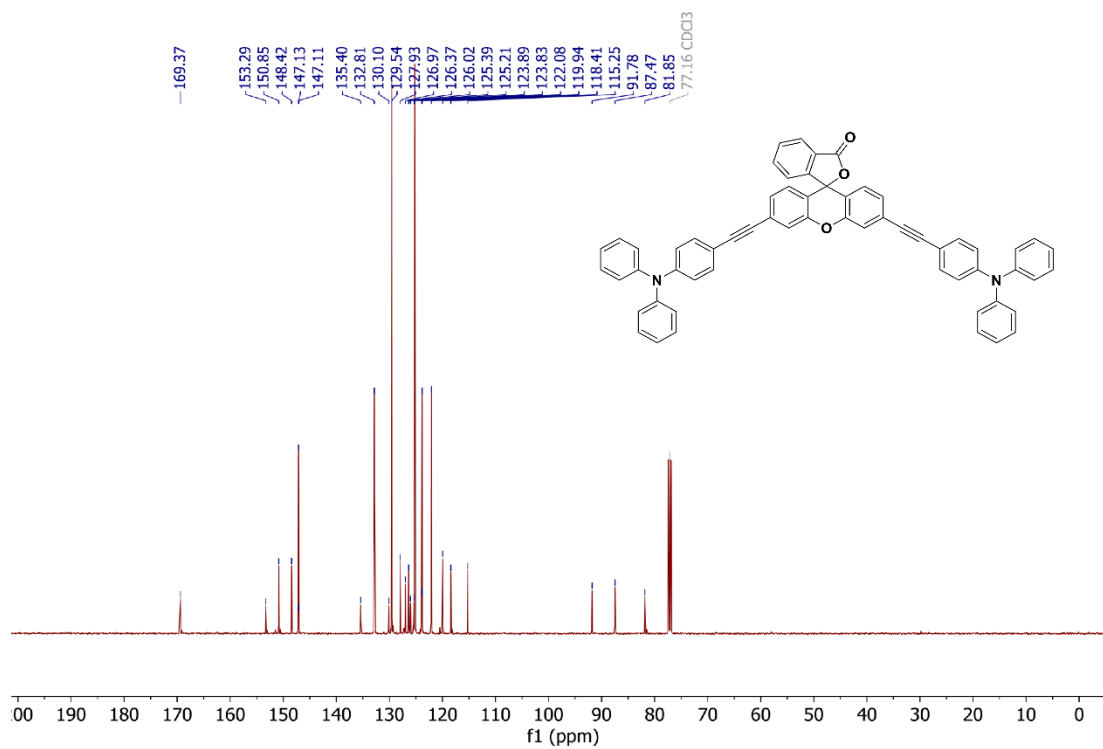

**<sup>1</sup>H NMR of compound Dye-4 (500 MHz)**

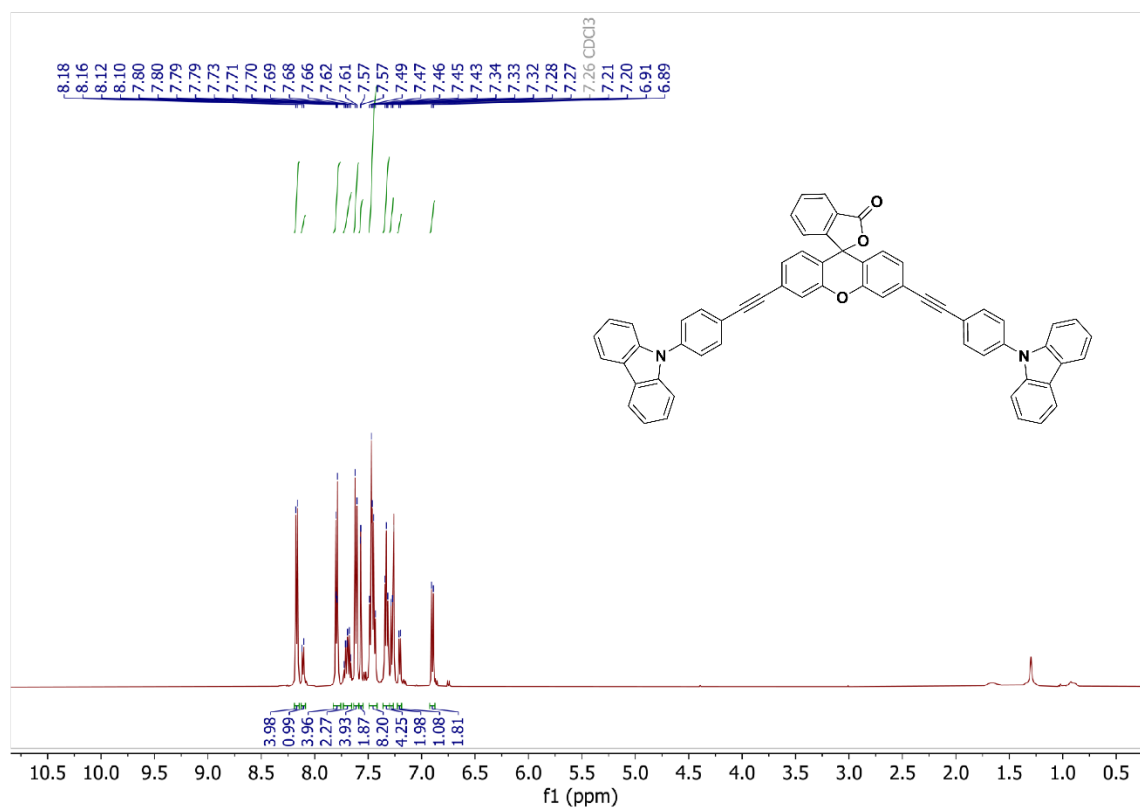

**$^{13}\text{C}$  NMR of compound Dye-4 (125 MHz)**

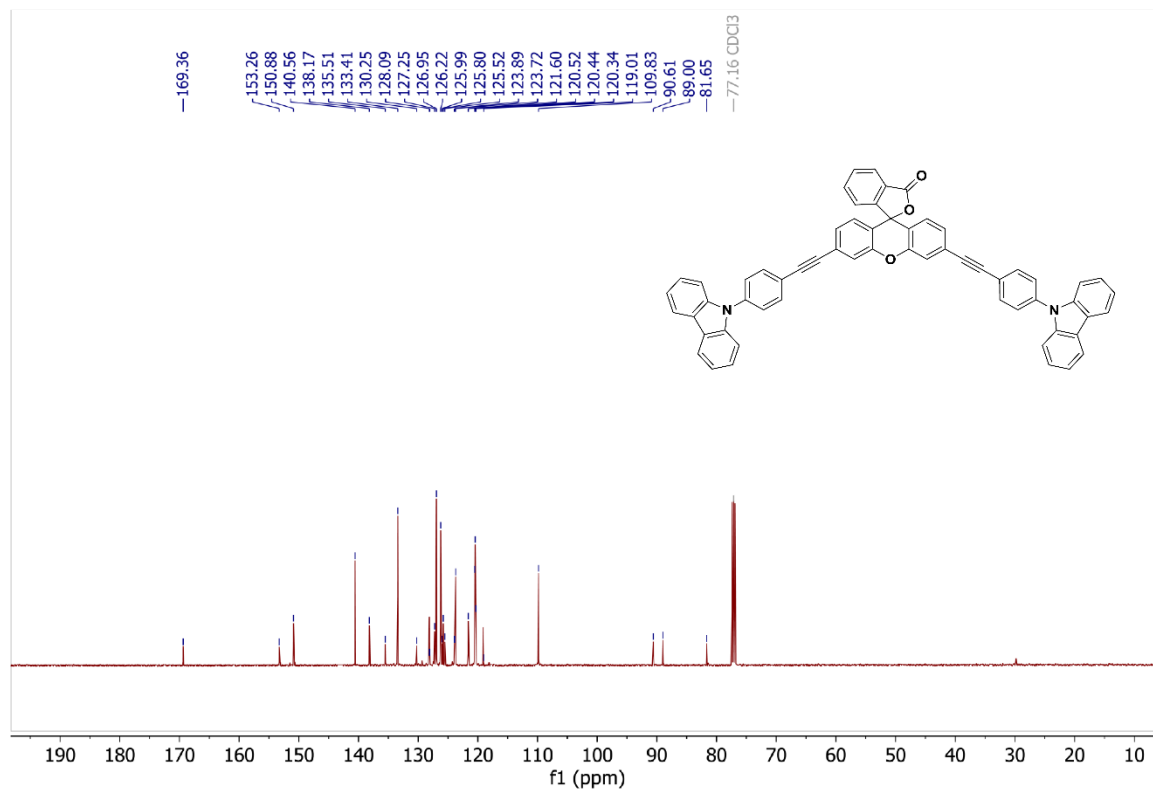

<sup>1</sup>H NMR of compound Dye-6 (500 MHz)

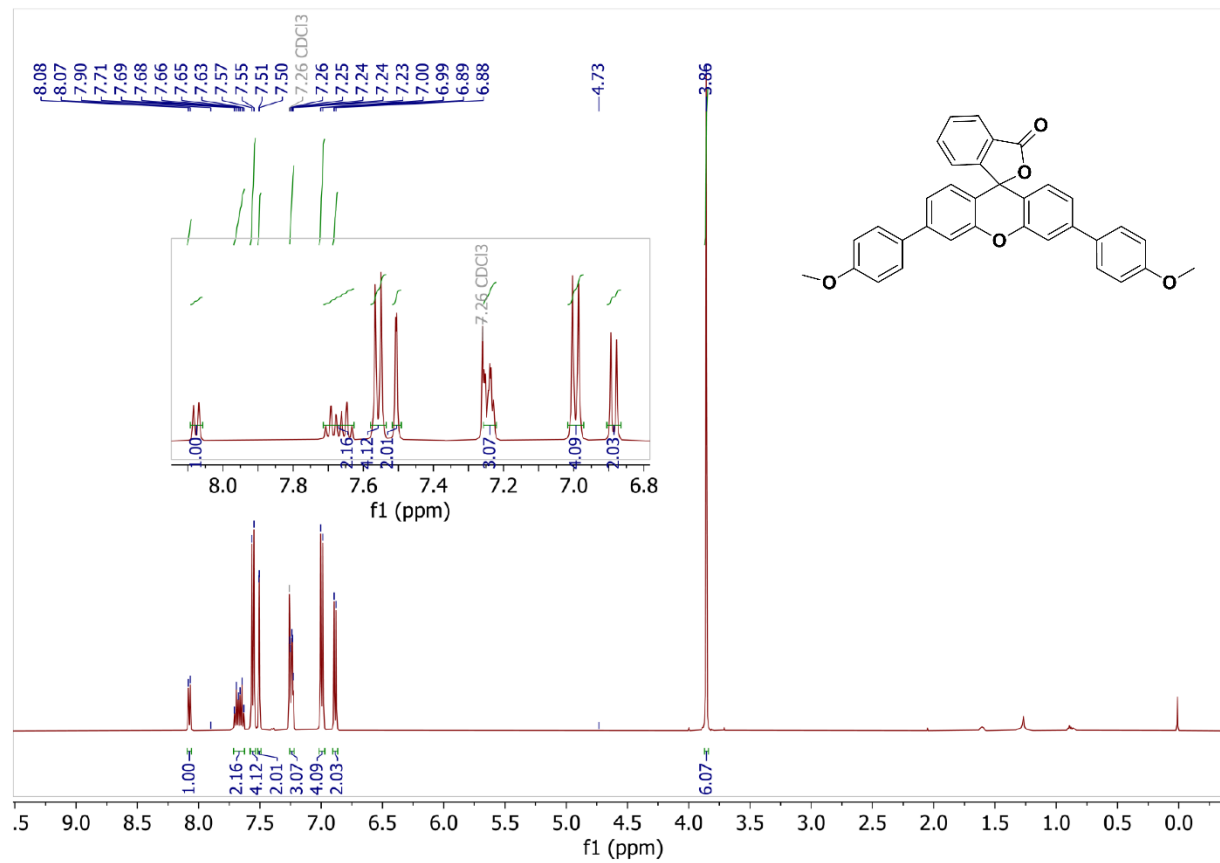



**<sup>13</sup>C NMR of compound Dye-6 (125 MHz)**

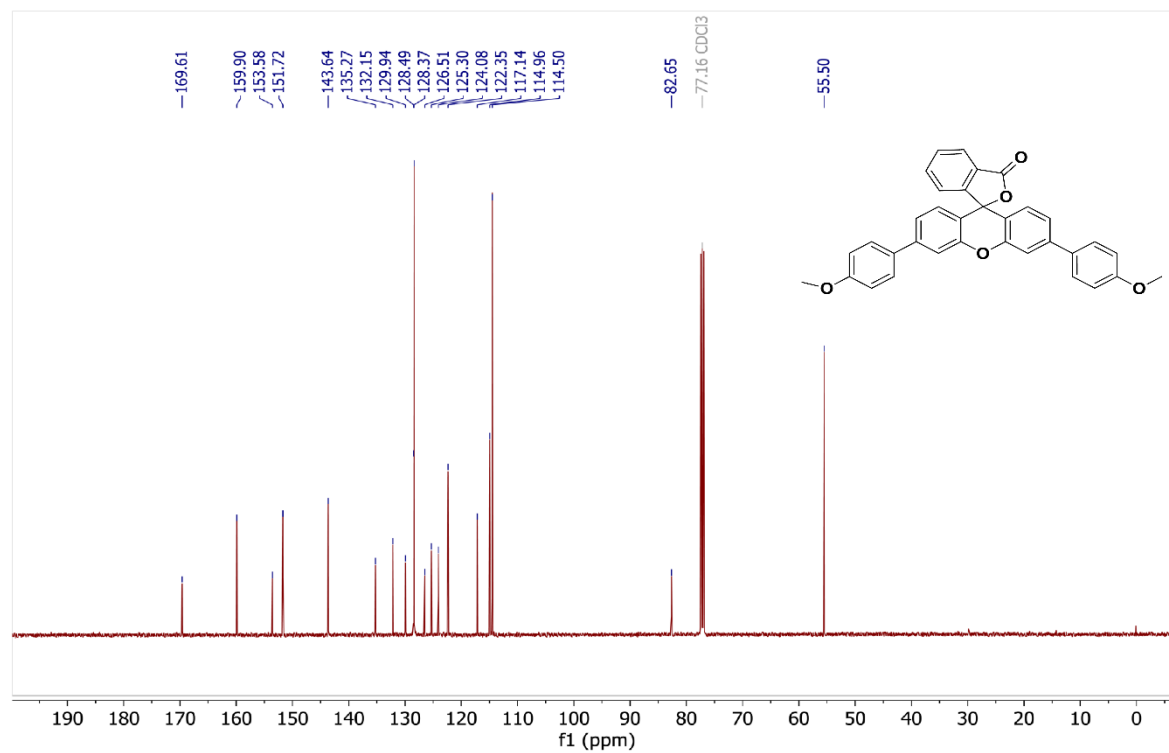

**<sup>1</sup>H NMR of compound Dye-7 (500 MHz)**

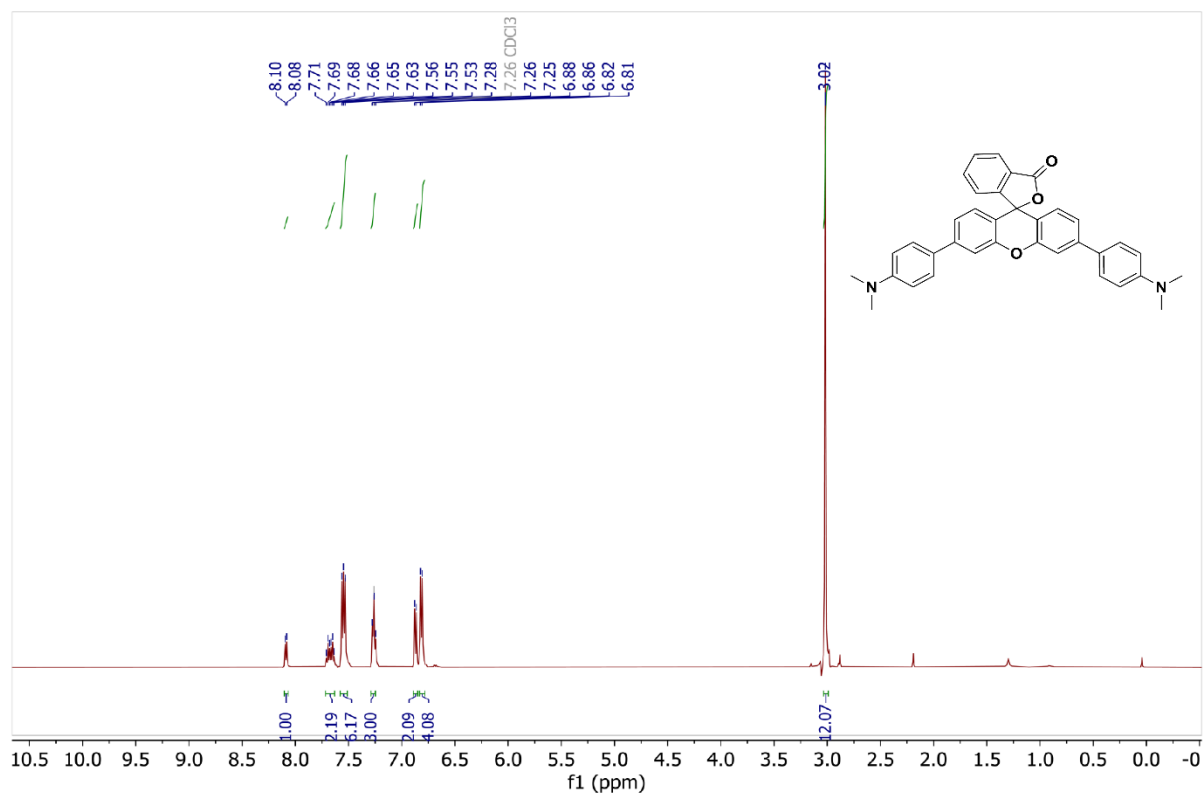

**$^{13}\text{C}$  NMR of compound Dye-7 (125 MHz)**

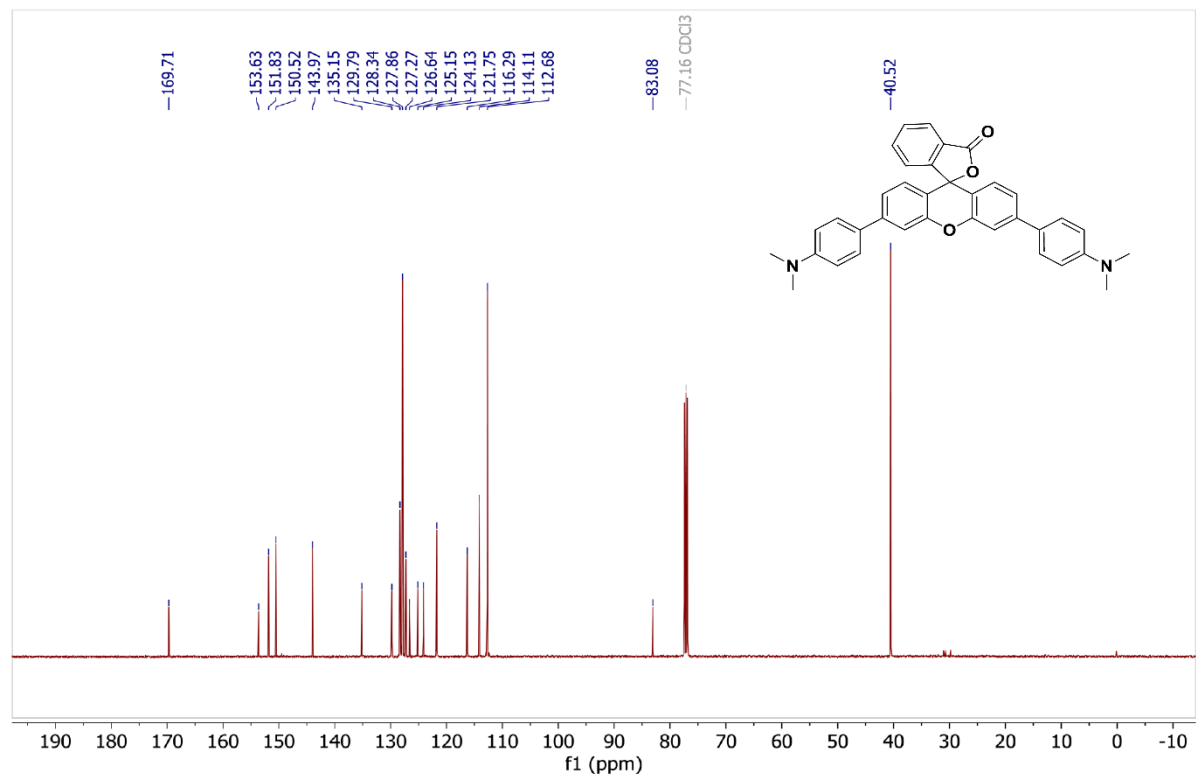

**$^1\text{H}$  NMR of compound Dye-8 (500 MHz)**

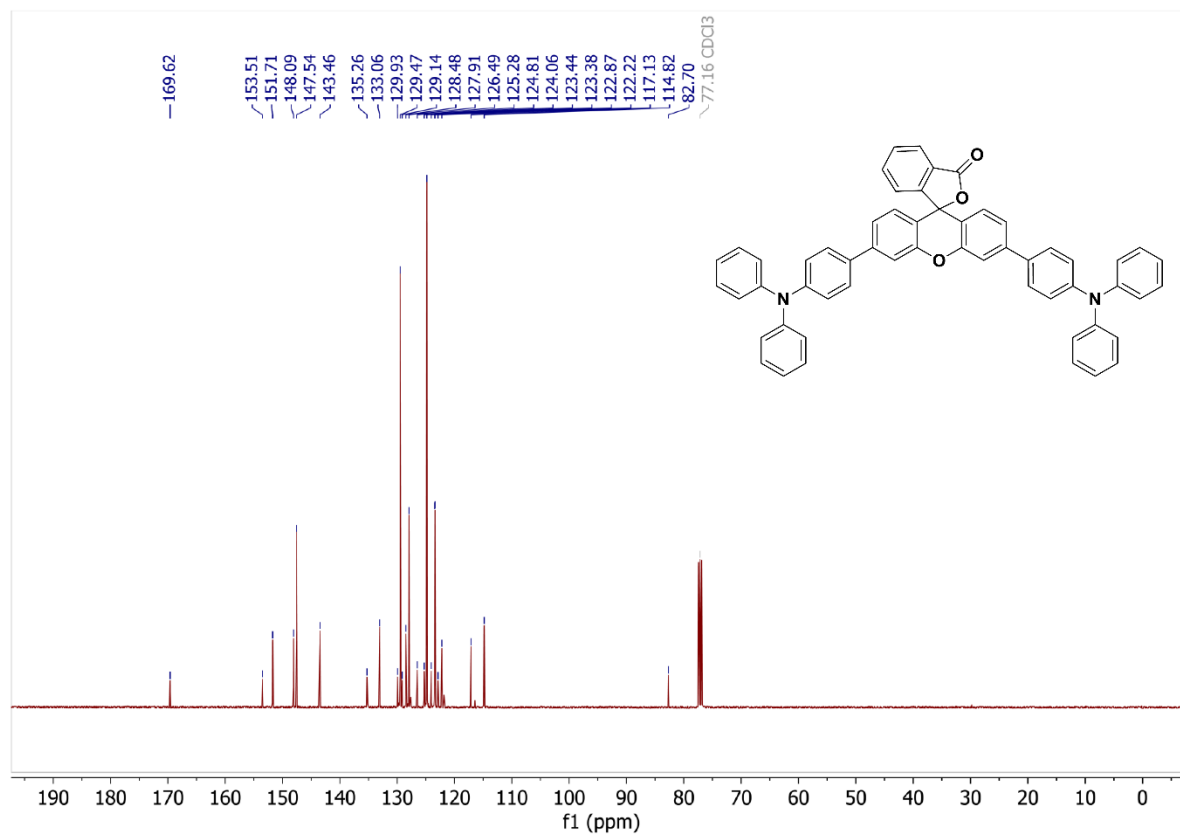

<sup>13</sup>C NMR of compound Dye-8 (125 MHz)

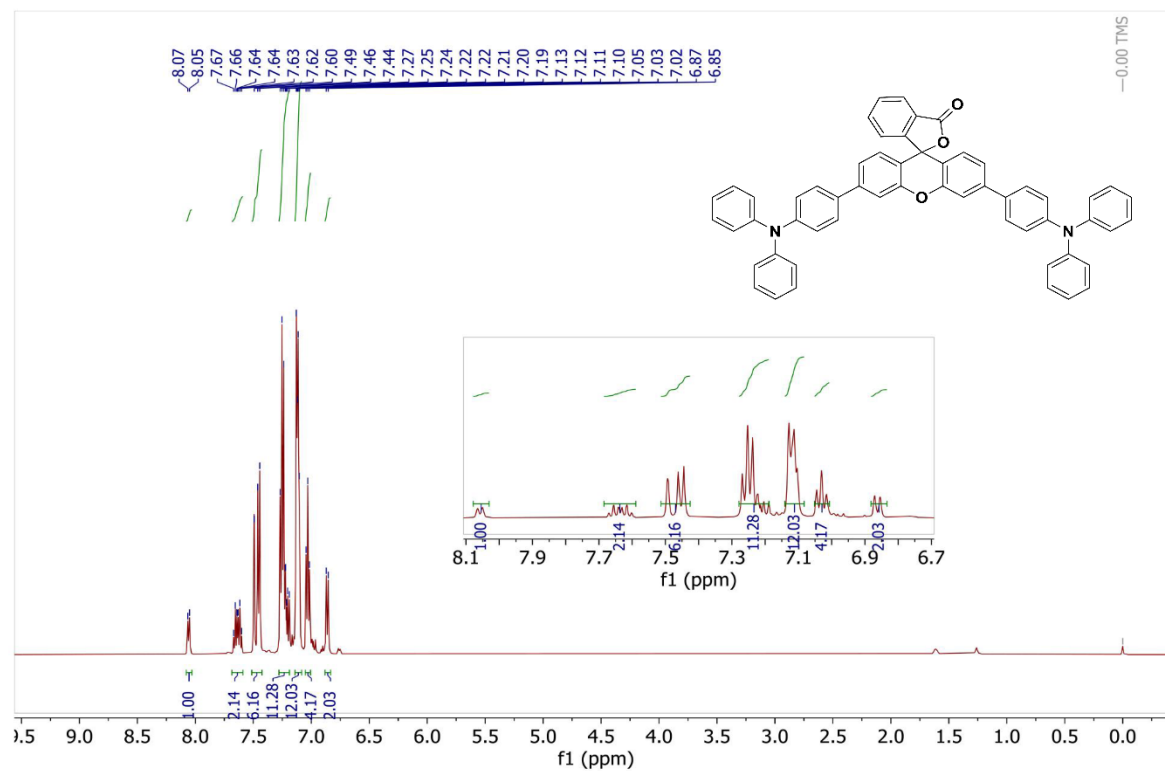

## HRMS Analysis (Dyes 1-4 and 6-8)

### Dye-1

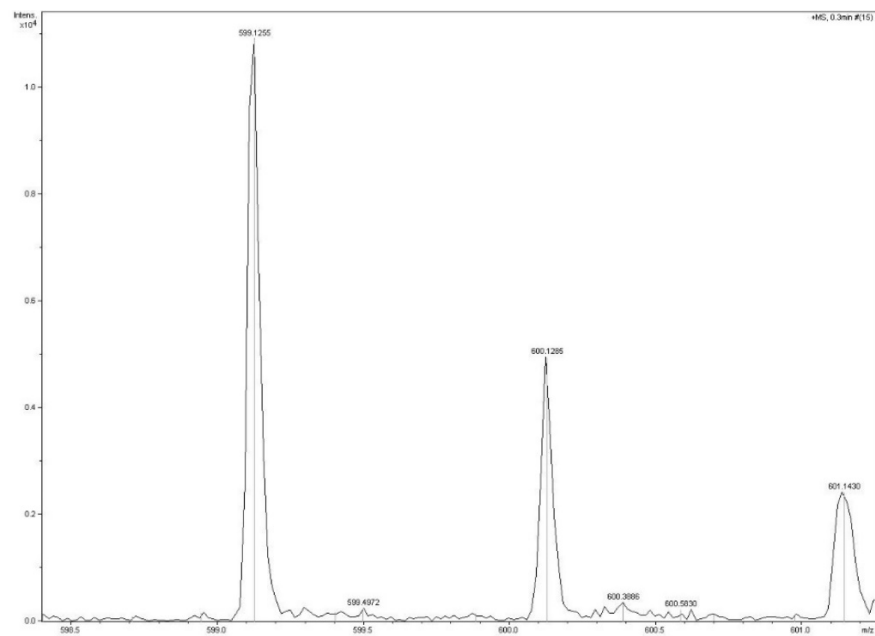

### Dye-2

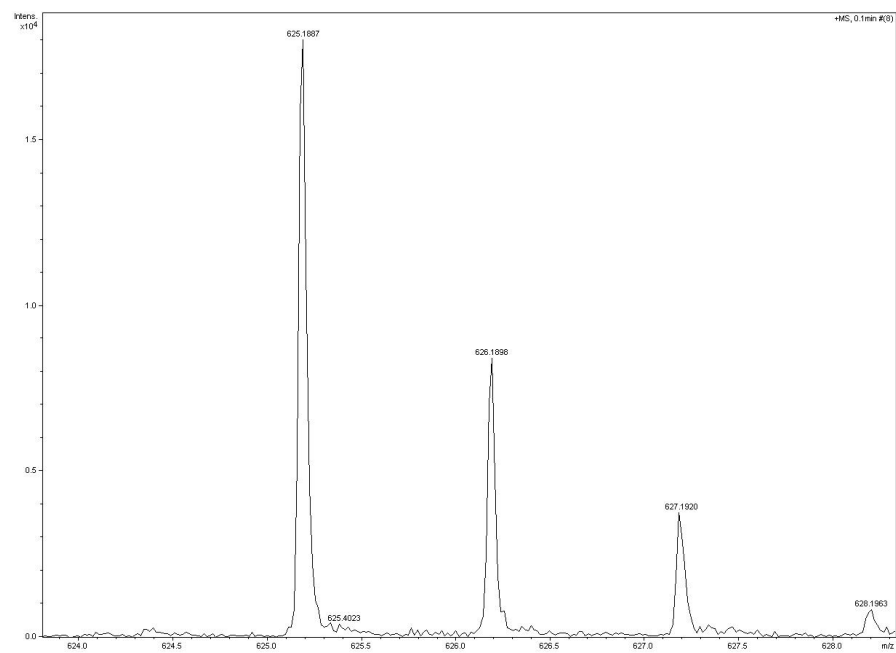

## Dye-3

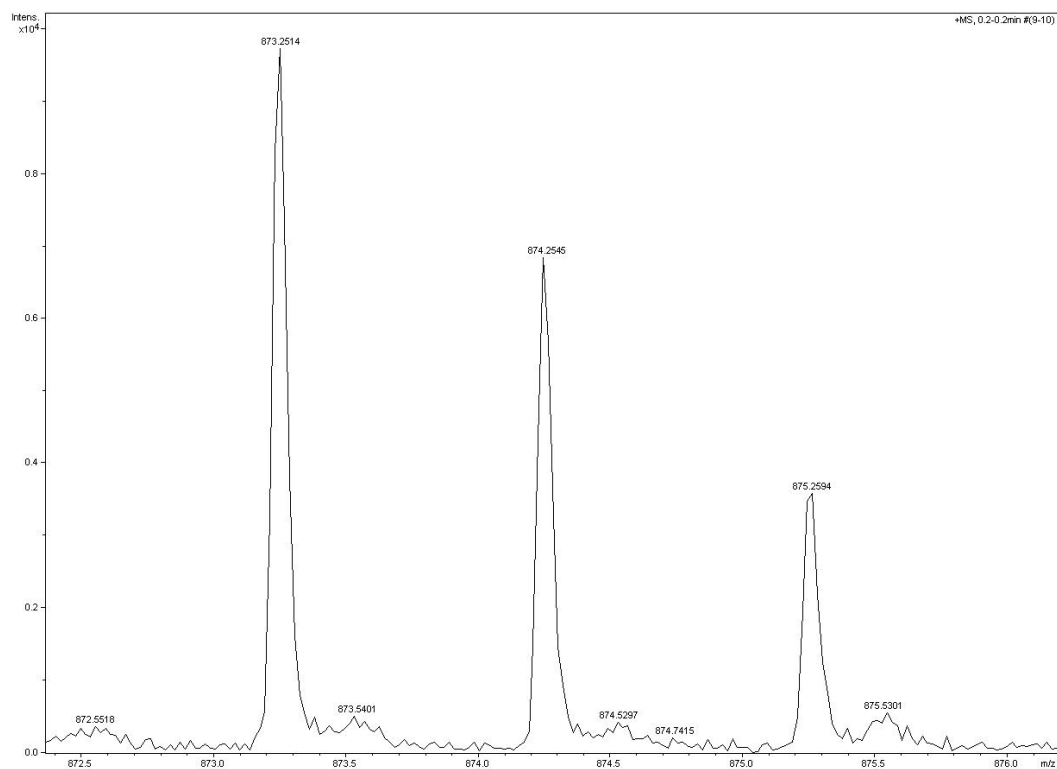

## Dye-4

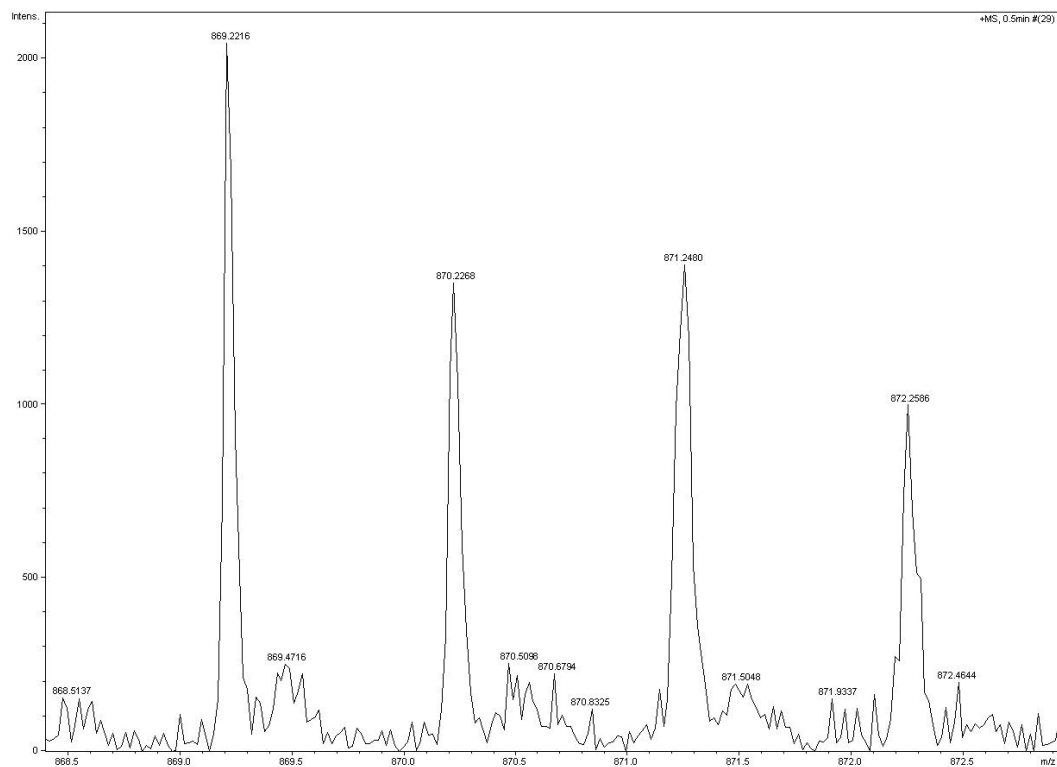

## Dye-6

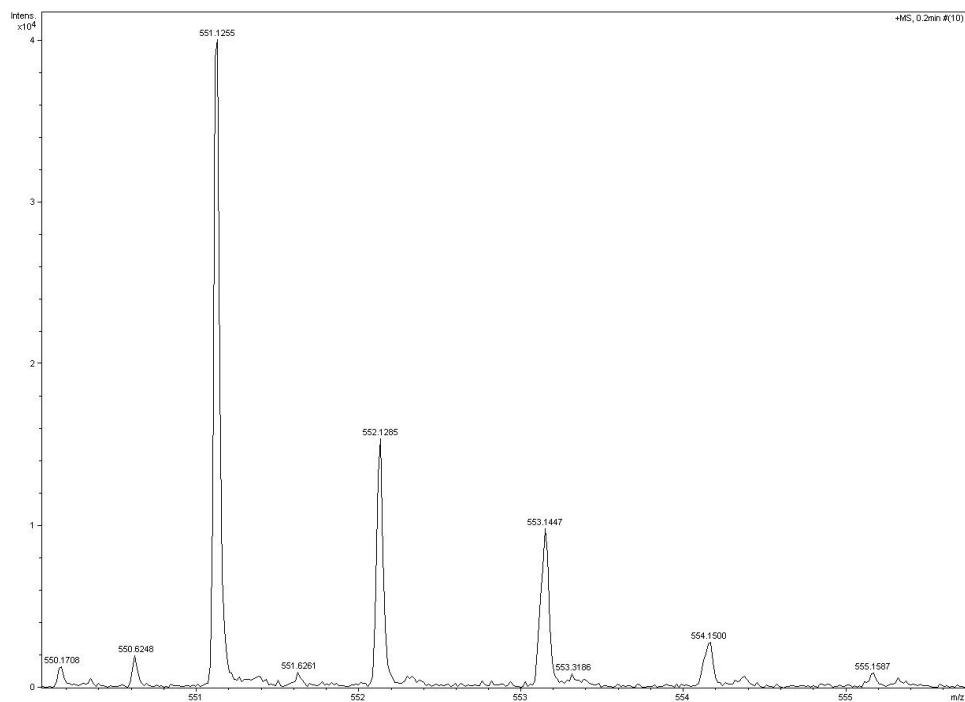

## Dye-7

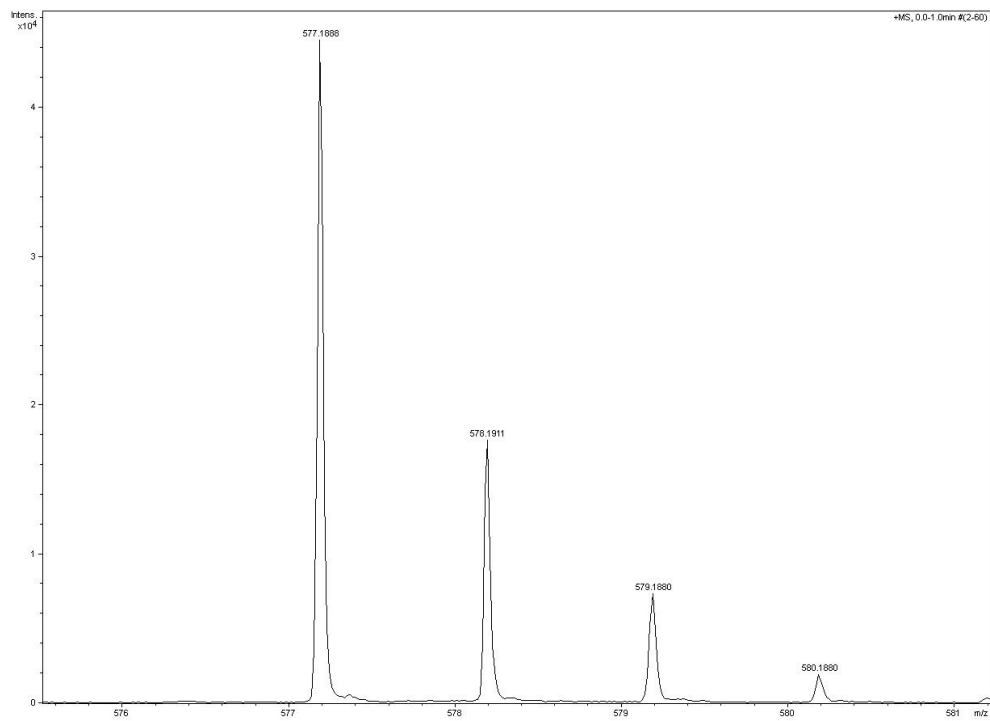



## Dye-8

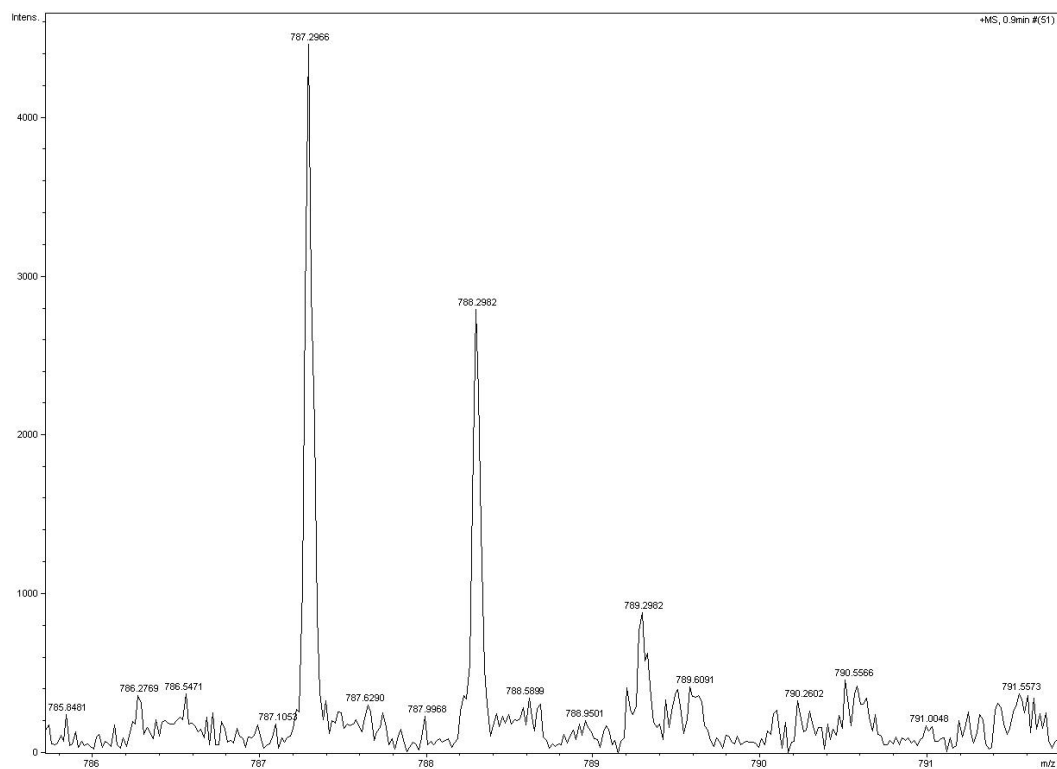

Supplement: s1 [file s1]
